# Supplementary material for: Chitosan Hydrogels Based on the Diels–Alder Click Reaction: Rheological and Kinetic Study
Source: MDPI journal article supplement (doi:10.3390/polym14061202), 2022-03-16
Supplement: s1 [file s1]

Article

# Chitosan Hydrogels Based on the Diels–Alder Click Reaction: Rheological and Kinetic Study

Cintha Ruiz-Pardo <sup>1</sup>, Luisa Silva-Gutiérrez <sup>1</sup>, Jaime Lizardi-Mendoza <sup>1</sup>, Yolanda López-Franco <sup>1</sup>, Carlos Peniche-Covas <sup>2</sup> and Waldo Argüelles-Monal <sup>1,\*</sup>

<sup>1</sup> Grupo de Investigación en Biopolímeros, Centro de Investigación en Alimentación y Desarrollo A.C., Hermosillo 83304, Sonora, Mexico; cinthya.ruiz@estudiantes.ciad.mx (C.R.-P.); lsilva@ciad.mx (L.S.-G.); jalim@ciad.mx (J.L.-M.); lopezf@ciad.mx (Y.L.-F.); waldo@ciad.mx (W.A.-M.)

<sup>2</sup> Facultad de Química, Universidad de la Habana, Vedado 10400, La Habana, Cuba; cpeniche2015@yahoo.com

\* Correspondence: waldo@ciad.mx

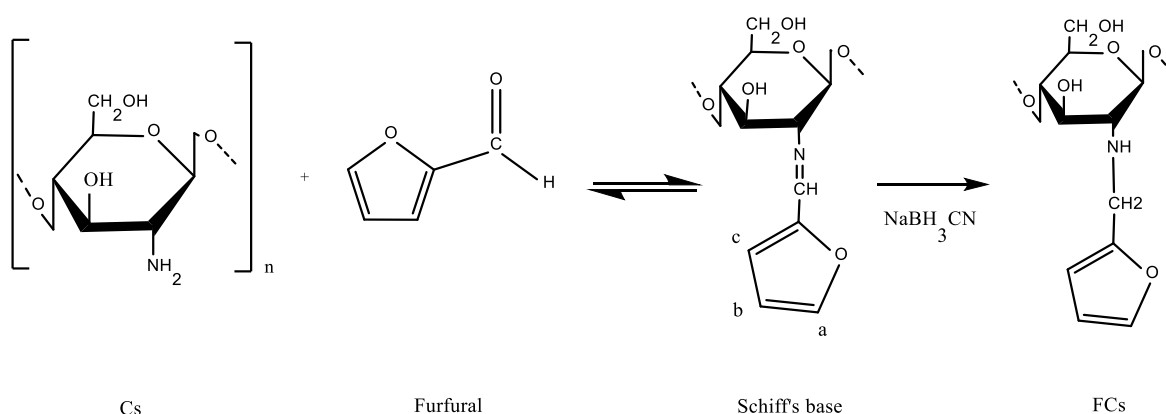

**Scheme S 1.** Synthesis of *N*-furfuryl chitosan.

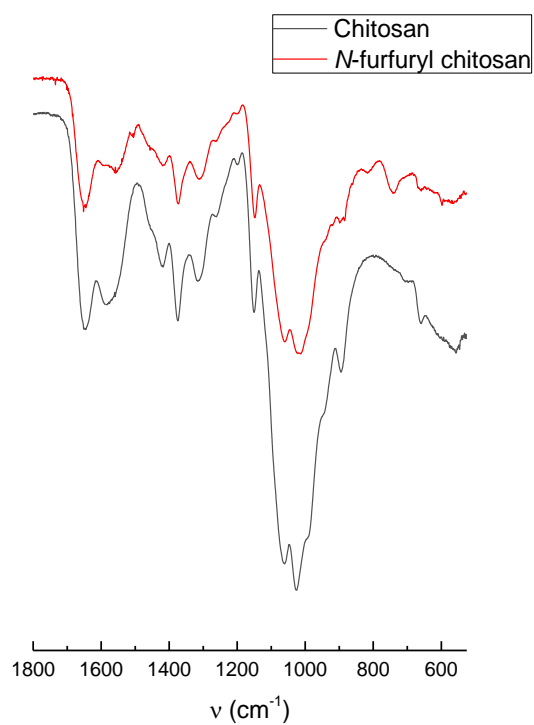

**Figure S1.** FT-IR spectra of chitosan and *N*-furfuryl chitosan.

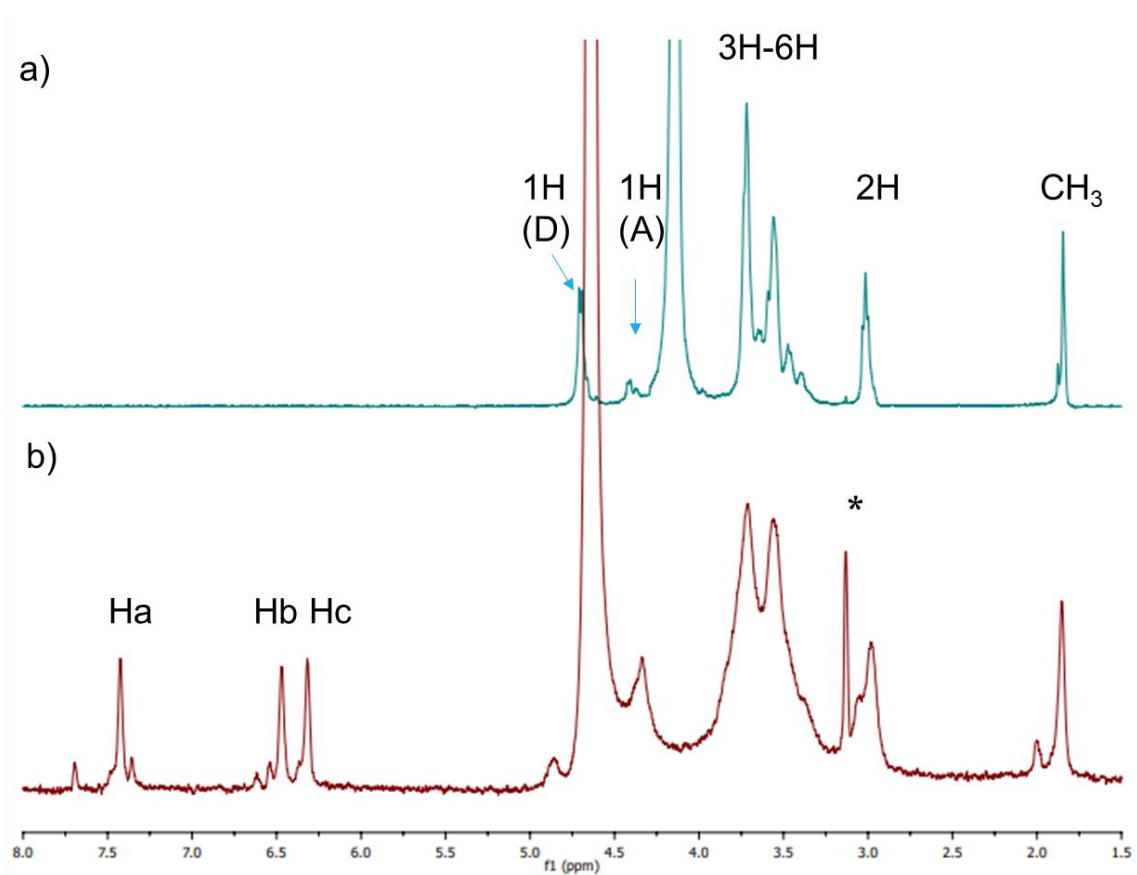

**Figure S2.**  $^1\text{H}$  NMR spectra of (a) chitosan and (b) *N*-furfuryl chitosan.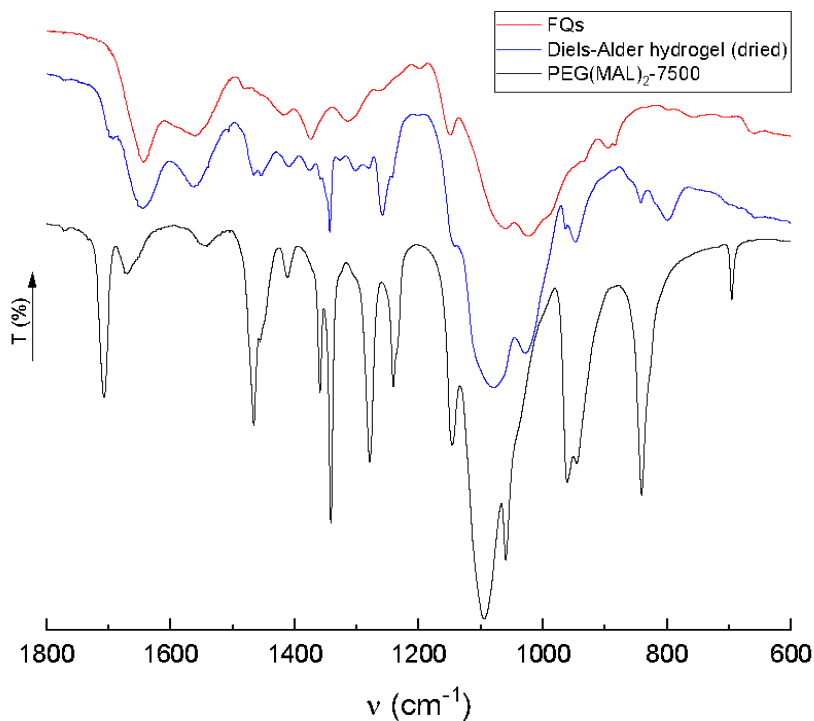**Figure S3.** FTIR spectra of the *N*-furfuryl chitosan, PEG-bismaleimide and Diels–Alder cycloadduct.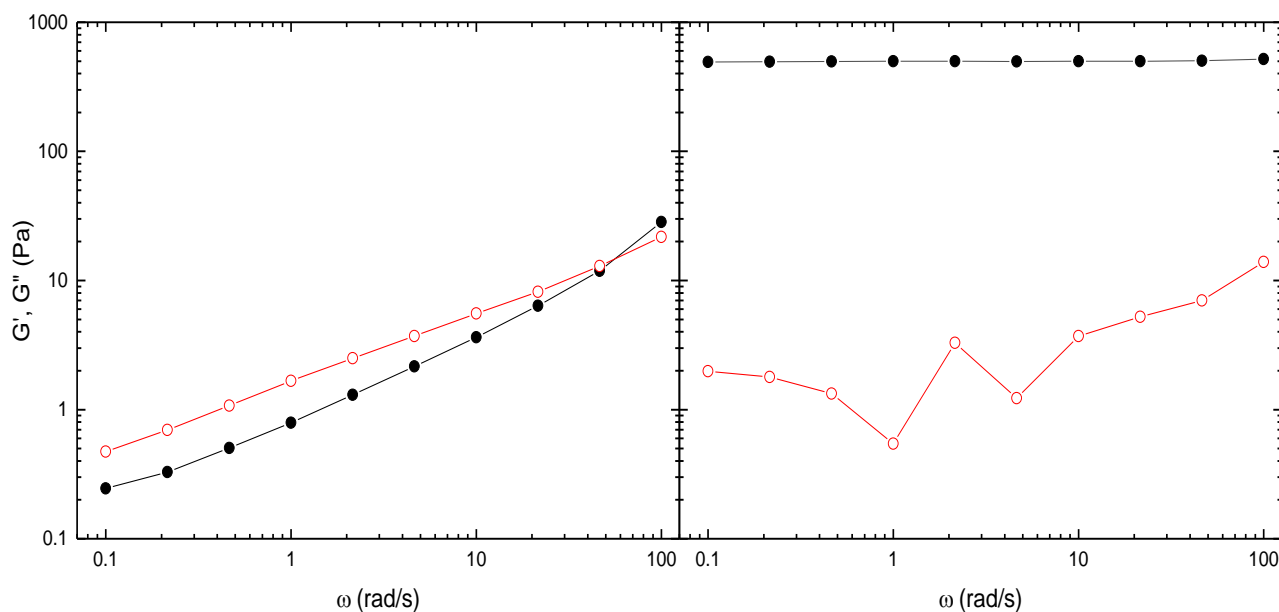**Figure S4.** Mechanical spectra at 25 °C of the system of *N*-(furfuryl)-chitosan (1 %-w/w) and PEG(mal)<sub>2</sub>-7500 with  $R = 0.25$  in 2% acetic acid a) before gelation and b) after gelation at 50 °C.  $G'$ , closed symbols, and  $G''$ , open symbols.

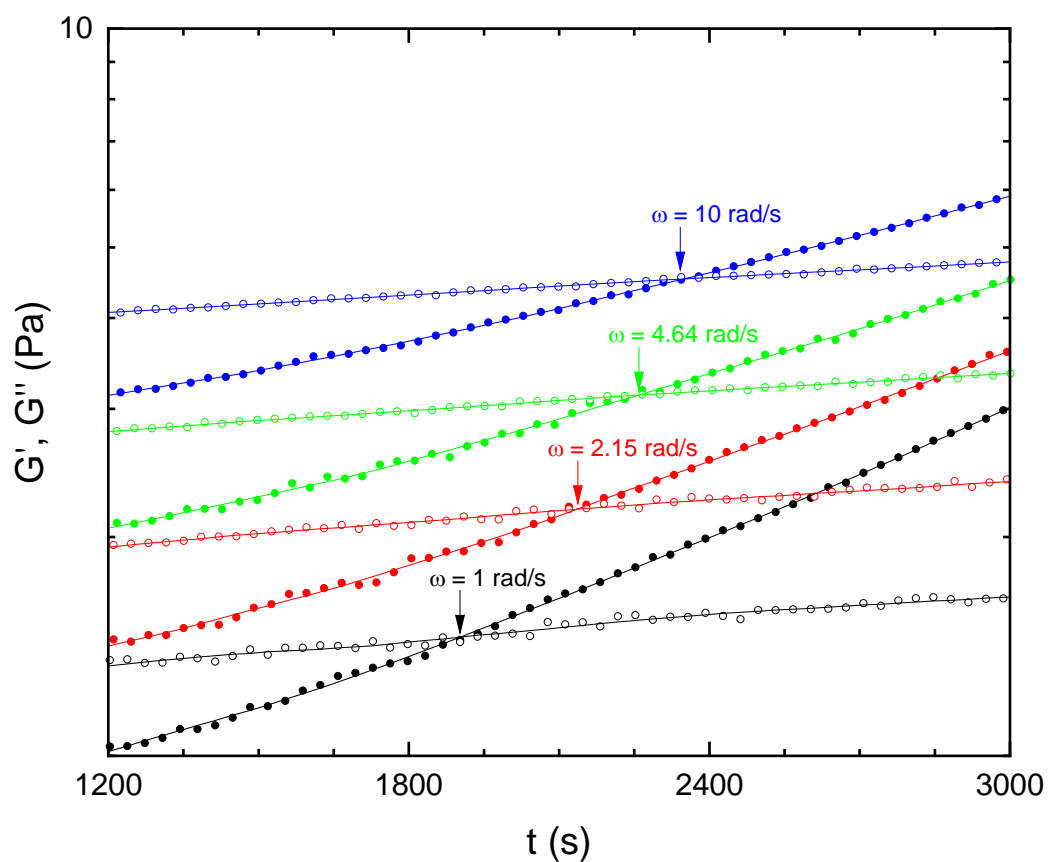

**Figure S5.** Storage and loss moduli as a function of the reaction time of the gelation process at 50 °C. *N*-furfuryl chitosan (21% degree of substitution) and PEG(mal) 2 -7500 dissolved in 2% acetic acid. Curves at different frequencies as marked in the graph. The frequency-dependence of moduli crossover point is obvious. Polymer concentration: 1 wt.%,  $R = 0.25$ .
